# Supplementary material for: Distal vessel stiffening is an early and pivotal mechanobiological regulator of vascular remodeling and pulmonary hypertension
Source: JCI journal article supplement (doi:10.1172/jci.insight.86987), 2016-06-01
Supplement: sd1 [file 1]

## SUPPLEMENTAL DATA

### **Distal vessel stiffening is an early and pivotal mechanobiological regulator of vascular remodeling and pulmonary hypertension**

Liu et al.; PA Stiffening is a Mechanobiological Regulator of PH

Fei Liu<sup>1\*</sup>, Christina Mallarino Haeger<sup>2\*</sup>, Paul B. Dieffenbach<sup>2</sup>, Delphine Sicard<sup>3</sup>, Izabela Chrobak<sup>4</sup>, Anna Maria F. Coronata<sup>2</sup>, Margarita M. Suárez Velandia<sup>2</sup>, Sally Vitali<sup>5</sup>, Romain A. Colas<sup>6</sup>, Paul C. Norris<sup>6</sup>, Aleksandar Marinković<sup>1</sup>, Xiaoli Liu<sup>2</sup>, Jun Ma<sup>2</sup>, Chase D. Rose<sup>5</sup>, Seon-Jin Lee<sup>2,7</sup>, Suzy A. A. Comhair<sup>8</sup>, Serpil C. Erzurum<sup>8</sup>, Jacob McDonald<sup>4</sup>, Charles N. Serhan<sup>6</sup>, Stephen R. Walsh<sup>9</sup>, Daniel J. Tschumperlin<sup>1,3</sup>, and Laura E. Fredenburgh<sup>2†</sup>

Molecular and Integrative Physiological Sciences, Department of Environmental Health, Harvard School of Public Health, Boston, MA<sup>1</sup>; Division of Pulmonary and Critical Care Medicine, Department of Medicine, Brigham and Women's Hospital, Boston, MA<sup>2</sup>; Department of Physiology and Biomedical Engineering, Mayo Clinic, Rochester, MN<sup>3</sup>; Lovelace Respiratory Research Institute, Albuquerque, NM<sup>4</sup>; Department of Anesthesia, Boston Children's Hospital, Boston, MA<sup>5</sup>; Center for Experimental Therapeutics and Reperfusion Injury, Department of Anesthesiology, Perioperative and Pain Medicine, Brigham and Women's Hospital, Boston, MA<sup>6</sup>; Medical Genomics Research Center, Korea Research Institute of Bioscience and Biotechnology, Daejeon, Korea<sup>7</sup>; Department of Pathobiology, Lerner Research Institute, Cleveland Clinic, Cleveland, OH<sup>8</sup>; Division of Infectious Diseases, Brigham and Women's Hospital, Boston, MA<sup>9</sup>

\* Authors have contributed equally to this work.

#### **†To Whom Correspondence Should Be Addressed:**

Laura E. Fredenburgh, MD  
Division of Pulmonary and Critical Care Medicine  
Brigham and Women's Hospital  
75 Francis Street  
Boston, MA 02115  
Phone: (617) 525-9563  
Fax: (617) 975-0980  
Email: lfredenburgh@rics.bwh.harvard.edu

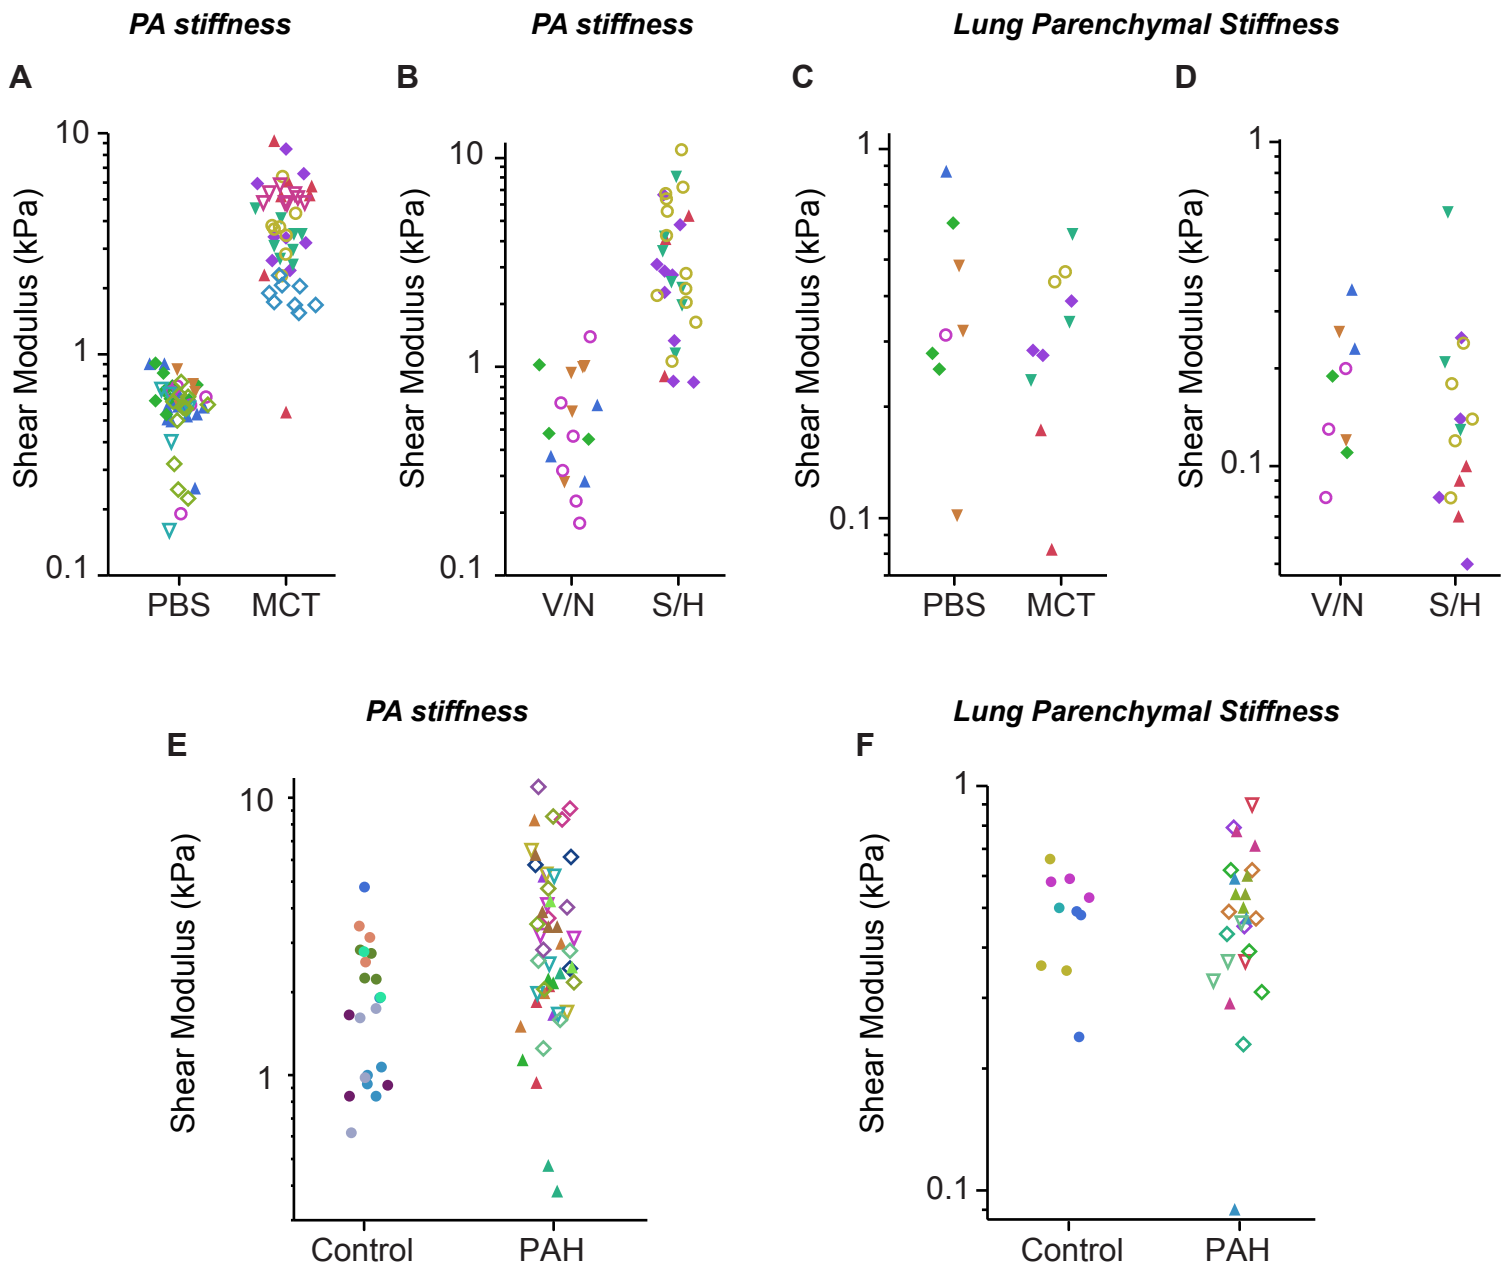

**Supplemental Figure 1. Increased PA stiffness in rat pulmonary hypertension models and human PAH.** (A, C) Sprague-Dawley rats were treated with monocrotaline (MCT) or PBS (n=6 per group) and lungs harvested after 4 weeks. (B, D) Sprague-Dawley rats were treated with SU5416 (S) or vehicle (V), exposed to hypoxia (H) or normoxia (N) for 3 weeks, and then returned to normoxia for an additional 5 weeks (n=4 per group). Pulmonary arterioles (PA) <100  $\mu\text{m}$  (A-B) and lung parenchyma (C-D) were mechanically characterized via AFM microindentation. Each symbol corresponds to one individual PA measurement and individual rats are identified by unique symbol/color pairs in each panel. (E-F) AFM microindentation was used to mechanically characterize PAs (E) and lung parenchyma (F) in human lung samples from IPAH (n=8;  $\blacktriangle$ ), FPAH (n=3;  $\nabla$ ), APAH (n=6;  $\diamond$ ), and control subjects (n=7;  $\bullet$ ). Each symbol corresponds to one individual PA measurement and each subject is represented by a unique symbol/color pair in each panel.

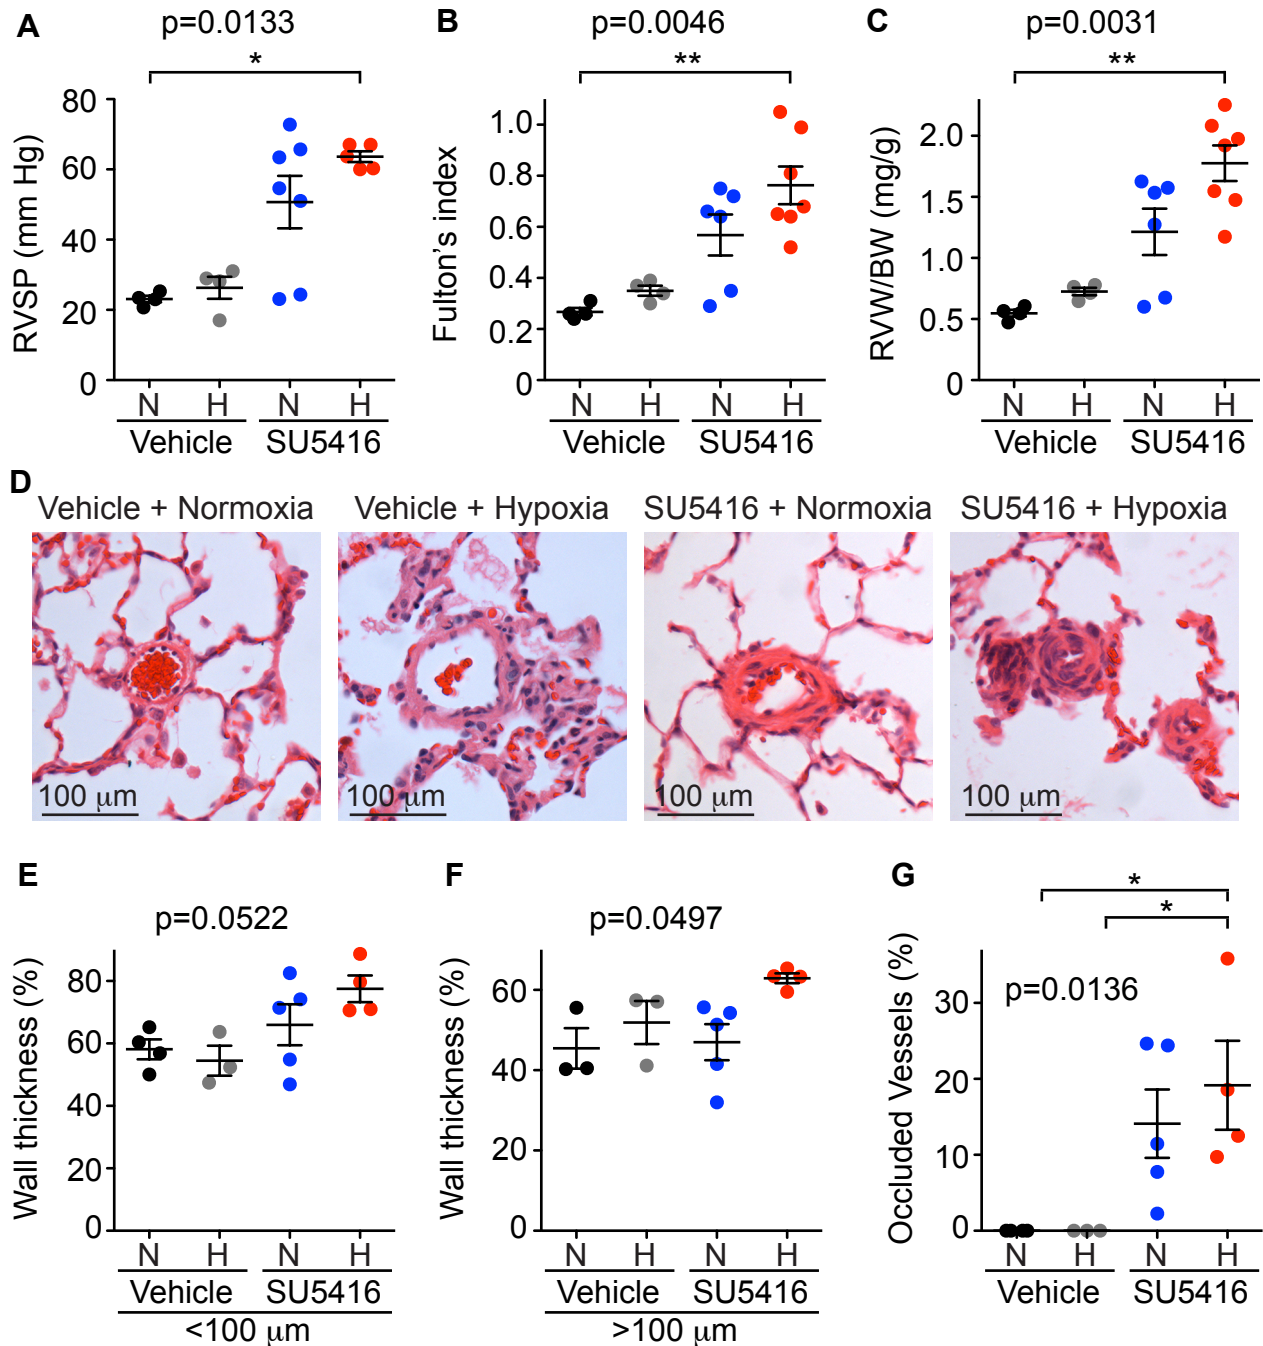

**Supplemental Figure 2. Increased RVSP, RVH, and pulmonary vascular remodeling following SU5416 and chronic hypoxia.** Male Sprague-Dawley rats were treated with sc SU5416 (20 mg/kg) or vehicle, exposed to hypoxia (n=5 for SU5416; n=4 for vehicle) or normoxia (n=7 for SU5416; n=4 for vehicle) for 3 weeks, and then returned to normoxia for an additional 5 weeks. **(A)** RVSP, **(B)** Fulton's index, and **(C)** RV weight (RVW, mg) normalized for body weight (BW, g). **(D)** Representative 5 μm hematoxylin and eosin (H&E)-stained sections in SU5416 hypoxia-exposed animals and controls. Quantification of wall thickness of **(E)** PAs <100 μm, **(F)** PAs >100 μm, and **(G)** vessel occlusion. Data represent the mean and SEM. Statistical significance was determined by one-way ANOVA followed by Dunn's post test (\*p<0.05; \*\*p<0.01; \*\*\*p<0.001).

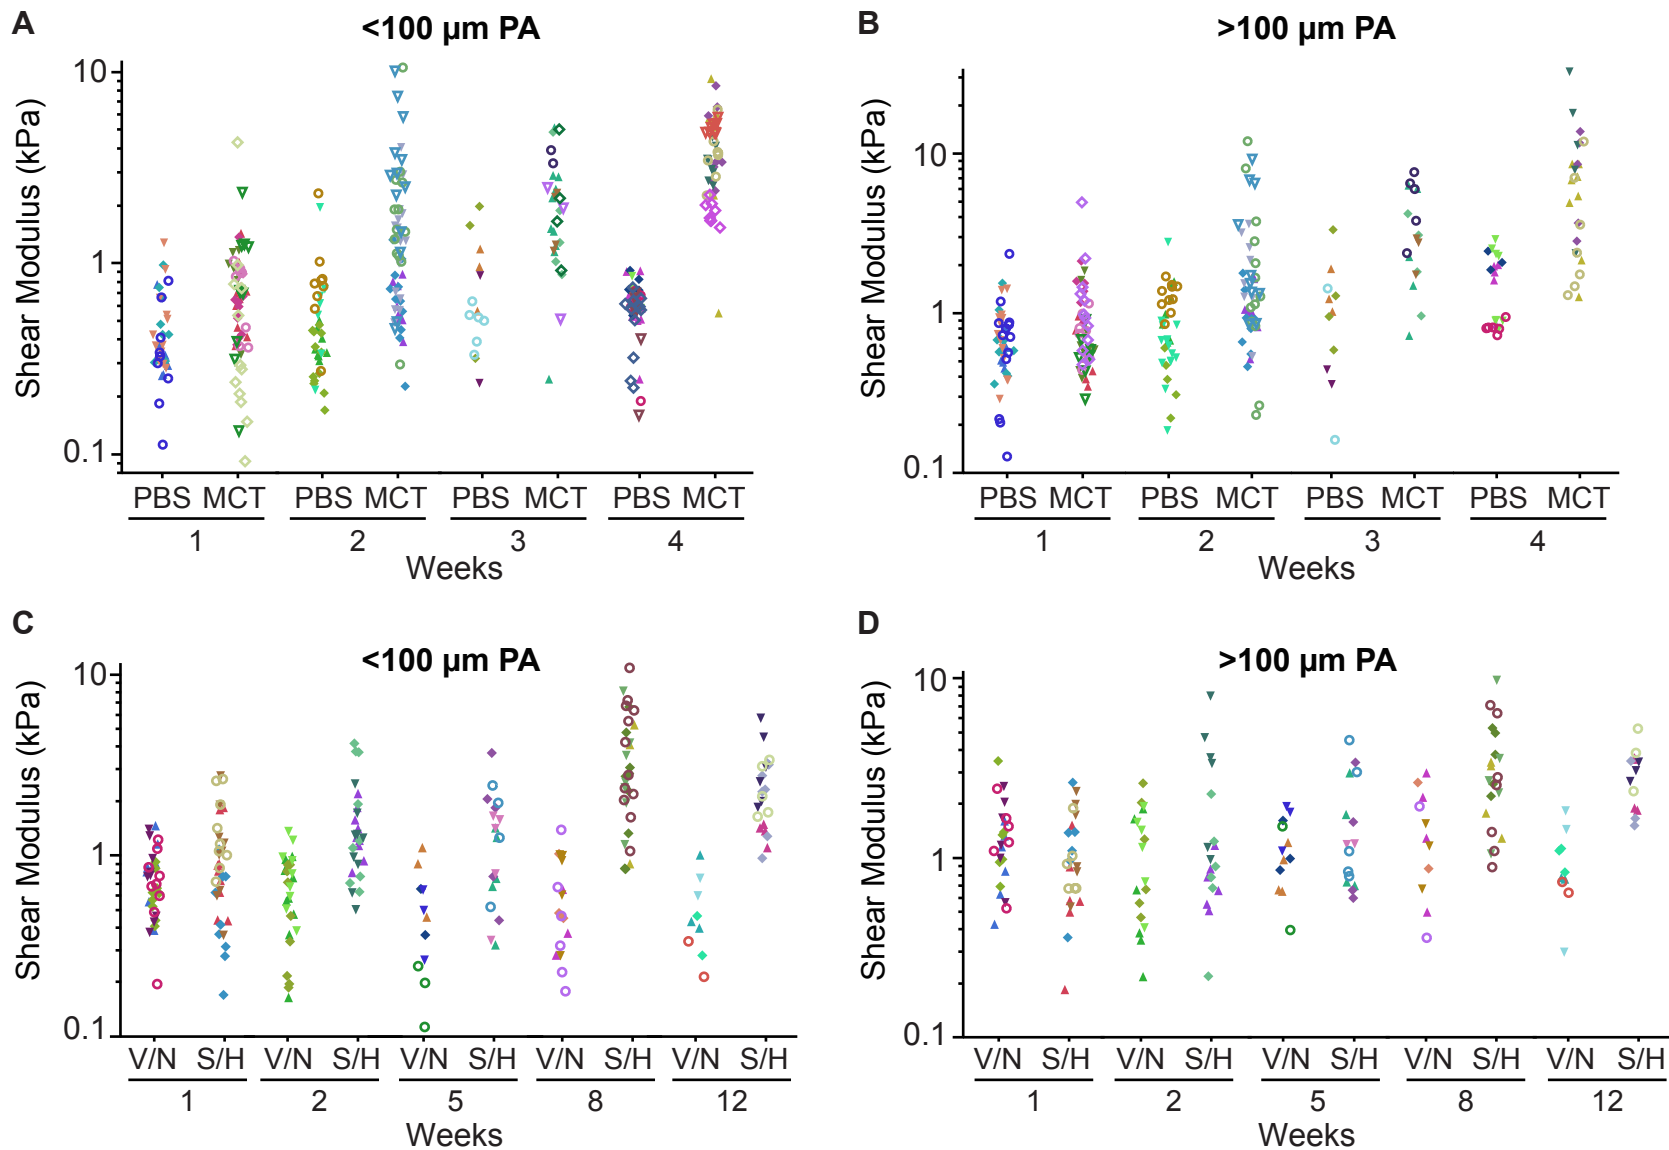

**Supplemental Figure 3. Distal PA stiffening occurs early in the MCT and sugen hypoxia models of pulmonary hypertension.** Male Sprague-Dawley rats were treated with monocrotaline (MCT) or PBS ( $n=6-8$  per time point) and harvested at serial time points following MCT. AFM microindentation was used to mechanically characterize **(A)** PAs  $<100 \mu\text{m}$  and **(B)** PAs  $>100 \mu\text{m}$ . Each symbol corresponds to one individual PA measurement and individual rats are identified by unique symbol/color pairs in each panel. Sprague-Dawley rats were treated with SU5416 (S) or vehicle (V), exposed to hypoxia (H) or normoxia (N) ( $n=4-8$  per time point) for 1, 2, or 3 weeks. Animals exposed to 3 weeks of hypoxia were returned to normoxia for an additional 2, 5, or 9 weeks. PAs  $<100 \mu\text{m}$  **(C)** and PAs  $>100 \mu\text{m}$  **(D)** were mechanically characterized via AFM microindentation. Each symbol corresponds to one individual PA measurement and individual rats are identified by unique symbol/color pairs in each panel.



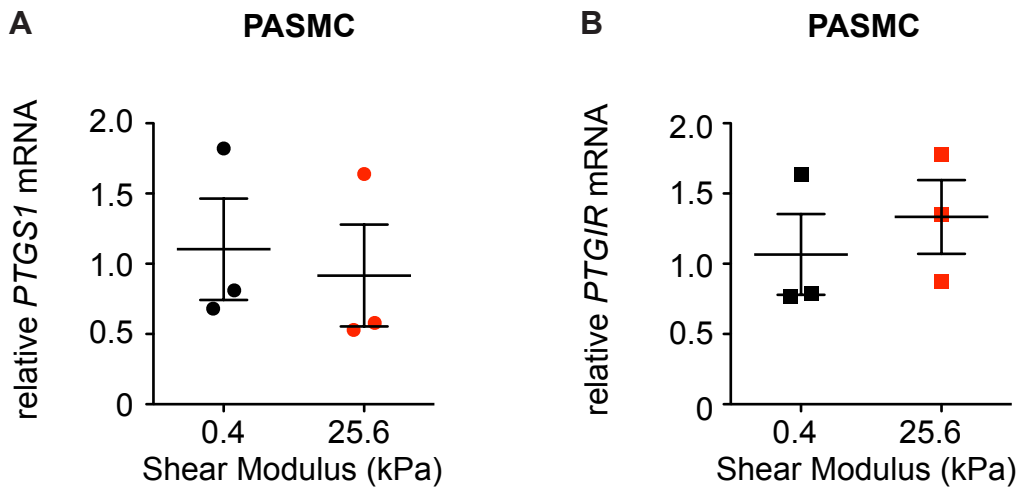

**Supplemental Figure 5. Stiffness does not alter COX-1 or PGI<sub>2</sub> receptor expression in PASC.** Human PASC were cultured on polyacrylamide substrates with shear moduli of 0.4 and 25.6 kPa. After 48 h, RNA was isolated, reverse-transcribed to cDNA, and qPCR was performed for *PTGS1* (A) and *PTGIR* (B). Results were normalized to GAPDH expression. p=NS by the Mann-Whitney U test. Data represent the mean and SEM of three independent experiments.

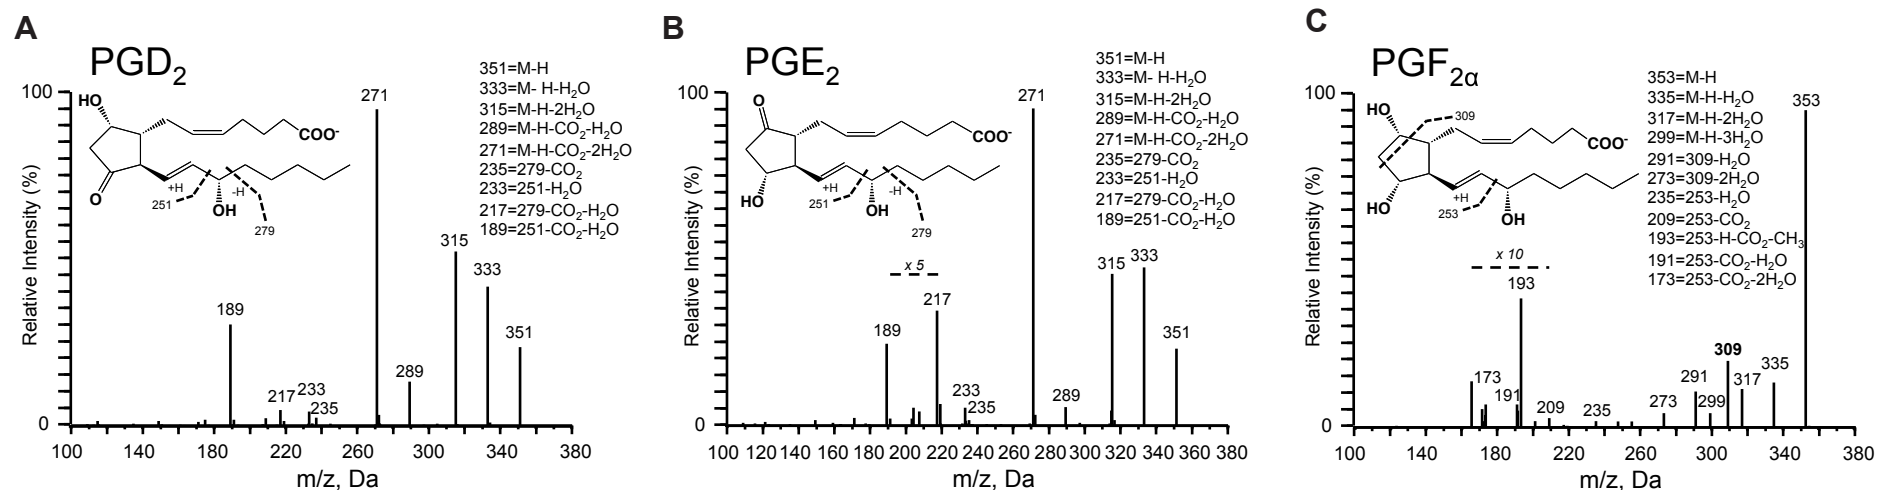

D

| Prostanoid levels (pg/100 mg lung tissue) |            |            |      |        |         |         |         |                |        |         |         |          |
|-------------------------------------------|------------|------------|------|--------|---------|---------|---------|----------------|--------|---------|---------|----------|
|                                           | MCT        |            |      |        |         |         |         | SU5416/hypoxia |        |         |         |          |
|                                           | Q1         | Q3         | CNT  | 1 week | 2 weeks | 3 weeks | 4 weeks | CNT            | 1 week | 2 weeks | 8 weeks | 12 weeks |
| <b>PGD<sub>2</sub></b>                    | <b>351</b> | <b>233</b> | 854  | 480    | 1304    | 967     | 816     | 593.3          | 127.4  | 433.7   | 2269.4  | 503.9    |
| <b>PGE<sub>2</sub></b>                    | <b>351</b> | <b>189</b> | 1425 | 110    | 200     | 132     | 1210    | 1187.6         | 43.0   | 295.5   | 3520.2  | 597.4    |
| <b>PGF<sub>2α</sub></b>                   | <b>353</b> | <b>193</b> | 2588 | 120    | 206     | 139     | 1073    | 296.3          | 17.5   | 51.8    | 703.5   | 126.9    |

**Supplemental Figure 6. Early reduction in prostanoid levels in MCT and SU5416/hypoxia models.** Lipid mediators were extracted from lungs of MCT (n=4-5) and SU5416/hypoxia (n=1) exposed rats at serial time points, and prostanoids assessed using LC-MS-MS. Characteristic MS-MS spectra were used for the identification of **(A)** PGD<sub>2</sub>, **(B)** PGE<sub>2</sub>, and **(C)** PGF<sub>2α</sub>. Da, dalton. **(D)** Prostanoid levels are expressed as pg/100 mg of lung tissue. Q1, M-H (parent ion) and Q3, diagnostic ion in the MS-MS (daughter ion). The detection limit was ~ 0.1 pg. CNT, control.

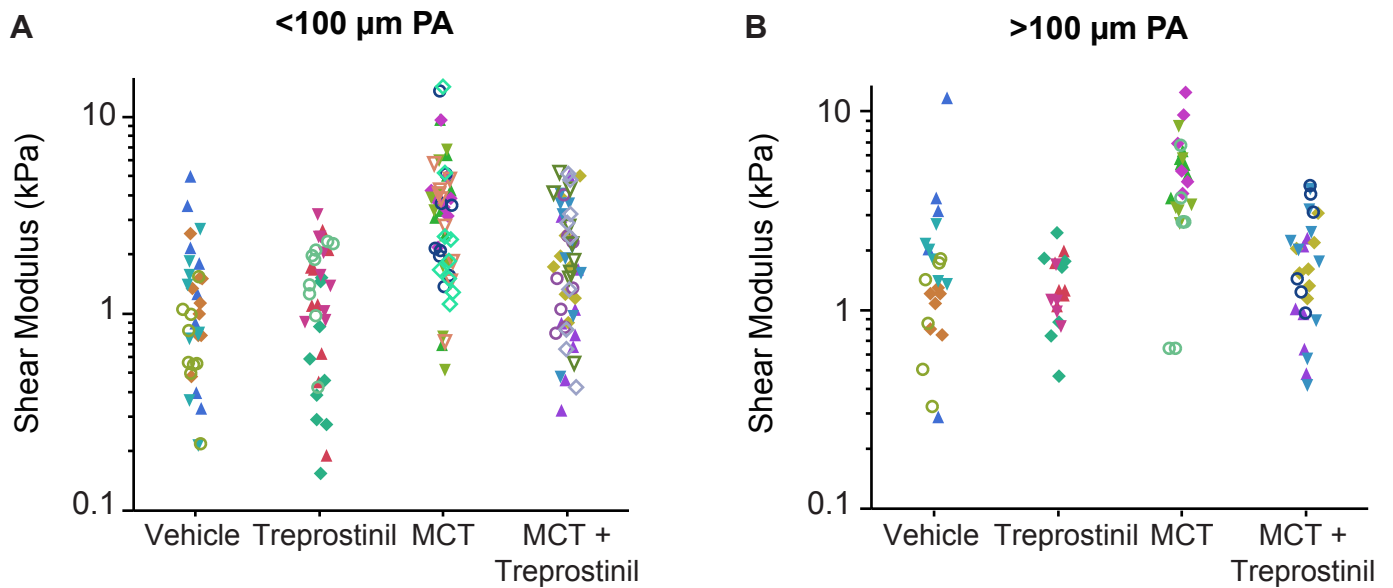

**Supplemental Figure 7. Treprostiniil prevents PA stiffening in the MCT model.** Sprague-Dawley rats were treated with MCT or vehicle and after 2 wks, had subcutaneous minipumps implanted to deliver intravenous treprostiniil (90 ng/kg/min) or saline. PAs <100 μm (**A**) and PAs >100 μm (**B**) were mechanically characterized via AFM microindentation. Each symbol corresponds to one individual PA measurement and individual rats are identified by unique symbol/color pairs in each panel.



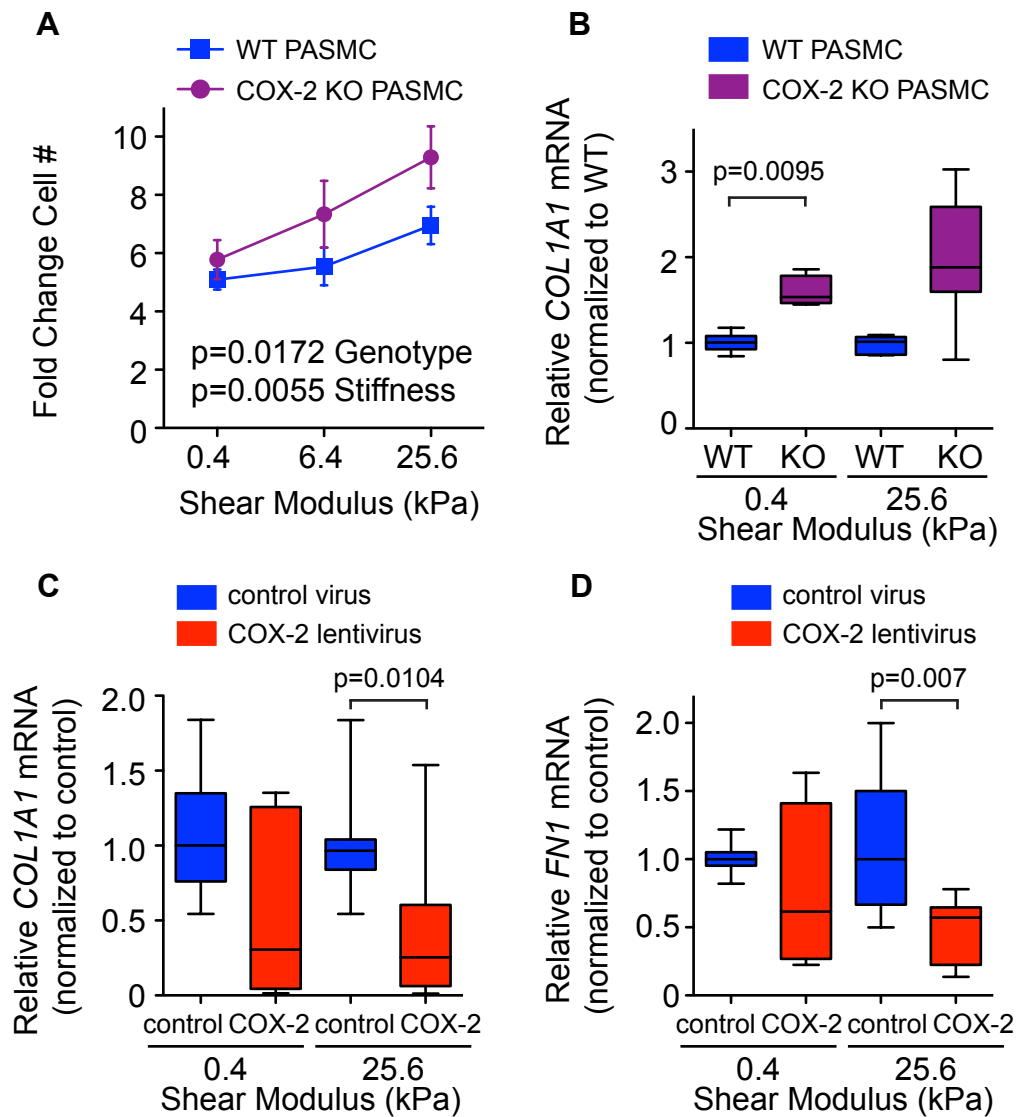

**Supplemental Figure 8. COX-2 expression alters the stiffness-dependent phenotype in PASC.** (A-B) COX-2 deficient and WT mouse PASC were plated on discrete stiffness polyacrylamide gels. (A) After 48 h, cell density was determined and normalized to 4 h. Statistical significance was determined by two-way ANOVA ( $p=0.0172$  genotype,  $p=0.0055$  stiffness,  $p=0.5793$  interaction). (B) RNA was harvested and qPCR was performed for *COL1A1* and normalized to GAPDH expression. (C-D) Human PASC overexpressing COX-2 were plated on discrete stiffness polyacrylamide gels and harvested after 48 h for qPCR for *COL1A1* (C) and *FN1* (D). Data represent 25th to 75th percentiles (box), median (line), and 5th and 95th percentiles (whiskers). Statistical significance was determined by the Mann-Whitney U test for pairwise comparisons.

Supplemental Table 1. Demographics and Clinical Characteristics of PAH Patients.

| Subject # | Diagnosis | Age | Sex | Race           | Ethnicity          | Associated Condition | WHO functional class | mPAP (mm Hg) | PVR (Wood Units)† |
|-----------|-----------|-----|-----|----------------|--------------------|----------------------|----------------------|--------------|-------------------|
| 1         | IPAH      | 29  | F   | White          | Non-Hispanic       | –                    | IV                   | 69           | 6.29              |
| 2         | IPAH      | 30  | F   | Black          | Non-Hispanic       | –                    | III                  | 41           | –                 |
| 3         | IPAH      | 32  | F   | White          | Non-Hispanic       | –                    | IV                   | 49           | 13.83             |
| 4         | IPAH      | 41  | F   | Hispanic       | Hispanic or Latino | –                    | IV                   | 43           | 5.47              |
| 5         | IPAH      | 41  | F   | White          | Non-Hispanic       | –                    | III                  | 55           | 9.84‡             |
| 6         | IPAH      | 56  | F   | White          | Non-Hispanic       | –                    | IV                   | 57           | 11.41‡            |
| 7         | IPAH      | 18  | M   | American-Asian | Non-Hispanic       | –                    | III                  | 67           | –                 |
| 8         | IPAH      | 51  | M   | White          | Non-Hispanic       | –                    | IV§                  | 30           | 5.92              |
| 9         | FPAH      | 33  | F   | White          | Non-Hispanic       | –                    | IV                   | 48           | 11.51             |
| 10        | FPAH      | 35  | M   | White          | Non-Hispanic       | –                    | III                  | –            | –                 |
| 11        | FPAH      | 37  | M   | White          | Non-Hispanic       | –                    | IV                   | 77           | 14.22‡            |
| 12        | APAH      | 35  | F   | Hispanic       | Hispanic or Latino | Drugs and toxins     | IV                   | 68           | –                 |
| 13        | APAH      | 40  | F   | Black          | Non-Hispanic       | SLE*                 | III                  | 36           | 7.43‡             |
| 14        | APAH      | 40  | F   | White          | Non-Hispanic       | CSTPS**              | IV                   | –            | –                 |
| 15        | APAH      | 64  | F   | –              | Hispanic or Latino | Scleroderma          | III                  | 32           | 5.98‡             |
| 16        | APAH      | 71  | F   | White          | Hispanic or Latino | RA***                | III                  | 42           | 2.48‡             |
| 17        | APAH      | 35  | M   | White          | Non-Hispanic       | CSTPS                | III                  | –            | –                 |

\* Systemic Lupus Erythematosus

\*\* Congenital Systemic-To-Pulmonary Shunt

\*\*\* Rheumatoid Arthritis

§ NYHA Functional Class

† Measured using thermodilution method.

‡ Measured using Fick method.

Supplemental Table 2. Demographics and Clinical Characteristics of Control Donors.

| Subject # | Age | Sex | Race  | Ethnicity          | Type of lethal injury   | Reason for no organ transplantation |
|-----------|-----|-----|-------|--------------------|-------------------------|-------------------------------------|
| 18        | 11  | M   | White | Non-Hispanic       | Anoxia                  | Low PaO <sub>2</sub>                |
| 19        | 20  | M   | –     | Hispanic or Latino | Head Trauma             | Lung trauma                         |
| 20        | 24  | M   | White | Non-Hispanic       | Intracranial hemorrhage | Inadequate lung function            |
| 21        | 25  | M   | White | Non-Hispanic       | Intracranial hemorrhage | No recipient                        |
| 22        | 26  | M   | White | Non-Hispanic       | Head Trauma             | Poor organ quality                  |
| 23        | 30  | M   | White | Non-Hispanic       | Head Trauma             | Inadequate lung function            |
| 24        | 33  | M   | White | Non-Hispanic       | Anoxia                  | Infiltrates on chest x-ray          |

Supplemental Table 3. Stiffness dependent gene expression in PASMIC.

| Gene          | Fold change<br>(0.4 kPa versus 25.6 kPa) |
|---------------|------------------------------------------|
| <i>ACE</i>    | -6.82                                    |
| <i>ACE2</i>   | -2.85                                    |
| <i>ALOX5</i>  | -1.26                                    |
| <i>ATP2C1</i> | -29.2                                    |
| <i>AVP</i>    | 13.6                                     |
| <i>AVPR1A</i> | 6.3                                      |
| <i>CHRNA1</i> | 5.5                                      |
| <i>CLIC-5</i> | 1.24                                     |
| <i>CNGB1</i>  | 7.01                                     |
| <i>DRD3</i>   | 3.48                                     |
| <i>EDN2</i>   | 4.82                                     |
| <i>EDNRA</i>  | -2.53                                    |
| <i>EDNRB</i>  | -5.17                                    |
| <i>ITPR1</i>  | -2.39                                    |
| <i>MYLK3</i>  | 5.06                                     |
| <i>NOSTRN</i> | -2.95                                    |
| <i>NPPB</i>   | 1.56                                     |
| <i>NPR1</i>   | -3.63                                    |
| <i>NPY1R</i>  | -3.89                                    |
| <i>PRKG2</i>  | -2.13                                    |
| <i>PTGS2</i>  | -3.16                                    |
| <i>SCNN1A</i> | 5.03                                     |
| <i>SPHK2</i>  | -1.75                                    |
| <i>UTS2R</i>  | 4.69                                     |

**Supplemental Table 3. Stiffness dependent gene expression in PASMIC.** PASMIC were cultured on polyacrylamide substrates with stiffnesses of 0.4 and 25.6 kPa. After 48 h, RNA was isolated, reverse transcribed, and qPCR performed using the Human Hypertension RT<sup>2</sup> Profiler PCR Array.

Supplemental Table 4. Primer sequences.

| Gene          | Forward Primer        |
|---------------|-----------------------|
|               | Reverse Primer        |
| <i>COL1A1</i> | CACACGTCTCGGTCATGGTA  |
|               | AAGAGGAAGGCCAAGTCGAG  |
| <i>FN1</i>    | ACCTCGGTGTTGTAAGGTGG  |
|               | CCATAAAGGGCAACCAAGAG  |
| <i>PTGS1</i>  | TCACACTGGTAGCGGTCAAG  |
|               | GTTCTTGCTGTTCCCTGCTCC |
| <i>PTGS2</i>  | CCGGGTACAATCGCACTTAT  |
|               | GGCGCTCAGCCATACAG     |
| <i>PTGIR</i>  | TTGCGGAAAAGGATGAAGAC  |
|               | GTGTGCTCCCTGCCTCTC    |
| <i>GAPDH</i>  | AATGAAGGGGTCATTGATGG  |
|               | AAGGTGAAGGTCGGAGTCAA  |
